# Supplementary material
Source: MDPI journal article supplement (https://www.mdpi.com/2075-163X/8/12/584)
Supplement: s1 [file s1]

_audit_creation_method            'SHELXL-2018/3'
_shelx_SHELXL_version_number      '2018/3'

_chemical_name_mineral          'kristiansenite' 
_chemical_compound_source       'Szklarska Poreba, Poland'
_chemical_formula_sum           'Ca8 O56 Sc3.73 Si16 Sn4.27' 
_chemical_formula_weight          2340.82 

_symmetry_cell_setting                  'triclinic'
_symmetry_Int_Tables_number             1
_symmetry_space_group_name_H-M          'C 1'
loop_
    _symmetry_equiv_pos_as_xyz
'x, y, z'
'x+1/2, y+1/2, z'
 
_cell_length_a                          10.0304(5)
_cell_length_b                          8.4056(4)
_cell_length_c                          13.3228(6)
_cell_angle_alpha                       90.001(3)
_cell_angle_beta                        109.105(3)
_cell_angle_gamma                       89.997(3)
_cell_volume                            1061.40(9)
_cell_formula_units_Z                   1
_cell_measurement_wavelength            0.71073
_cell_measurement_reflns_used           6523 
_cell_measurement_theta_min             3.23
_cell_measurement_theta_max             29.57
_cell_measurement_temperature           100

_exptl_absorpt_coefficient_mu           4.618
_exptl_crystal_F_000                    1123.8
_exptl_crystal_density_diffrn           3.662
_exptl_crystal_description              'dome-shaped brown crystal'
_exptl_crystal_size_max                 0.060
_exptl_crystal_size_min                 0.045
  
_diffrn_ambient_temperature             100
_diffrn_radiation_wavelength            0.71073
_diffrn_measurement_device_type         'Bruker APEX-II CCD'
_diffrn_measurement_method              '\f and \w scans'
_diffrn_radiation_monochromator         'graphite'
_diffrn_radiation_source                'fine-focus sealed tube' 
_diffrn_reflns_av_R_equivalents         0.0936
_diffrn_reflns_av_unetI/netI            0.0926
_diffrn_reflns_number                   29210
_diffrn_reflns_limit_h_min              -14
_diffrn_reflns_limit_h_max              14
_diffrn_reflns_limit_k_min              -11
_diffrn_reflns_limit_k_max              11
_diffrn_reflns_limit_l_min              -18
_diffrn_reflns_limit_l_max              18
_diffrn_reflns_theta_min                1.62
_diffrn_reflns_theta_max                30.08
_diffrn_reflns_theta_full               30.08
_diffrn_measured_fraction_theta_full
                                        0.996
_diffrn_measured_fraction_theta_max
                                        0.996
_reflns_number_total                    6213
_reflns_number_gt                       4503
_reflns_threshold_expression            >2sigma(I)
 
_atom_sites_solution_primary            direct
_atom_sites_solution_secondary          difmap 
 
_refine_ls_structure_factor_coef  Fsqd  
_refine_ls_matrix_type            full 
_refine_ls_weighting_scheme       calc  
_refine_ls_weighting_details 
 'calc w=1/[\s^2^(Fo^2^)+(0.0497P)^2^+0.0000P] where P=(Fo^2^+2Fc^2^)/3' 
_refine_ls_extinction_method      none 
_refine_ls_extinction_coef        ? 
_refine_ls_abs_structure_details 
 'Flack H D (1983), Acta Cryst. A39, 876-881' 
_refine_ls_abs_structure_Flack    0.00(5) 
_refine_ls_number_reflns          6213 
_refine_ls_number_parameters      339 
_refine_ls_number_restraints      0 
_refine_ls_R_factor_all           0.0836 
_refine_ls_R_factor_gt            0.0496 
_refine_ls_wR_factor_ref          0.1141 
_refine_ls_wR_factor_gt           0.1032 
_refine_ls_goodness_of_fit_ref    1.052 
_refine_ls_restrained_S_all       1.052 
_refine_ls_shift/su_max           0.024 
_refine_ls_shift/su_mean          0.004
 
loop_ 
 _atom_site_label 
 _atom_site_type_symbol 
 _atom_site_fract_x 
 _atom_site_fract_y 
 _atom_site_fract_z 
 _atom_site_U_iso_or_equiv 
 _atom_site_adp_type 
 _atom_site_occupancy 
 _atom_site_symmetry_multiplicity 
 _atom_site_calc_flag 
 _atom_site_refinement_flags 
 _atom_site_disorder_assembly 
 _atom_site_disorder_group 
Ca1 Ca 0.0000 0.0000 0.0000 0.0177(6) Uani 1 1 d . . . 
Ca2 Ca 0.0010(4) 0.7003(4) -0.4984(3) 0.0171(6) Uani 1 1 d . . . 
Ca3 Ca 0.2017(4) -0.0030(4) -0.2699(3) 0.0177(7) Uani 1 1 d . . . 
Ca4 Ca 0.2019(2) 0.7035(2) -0.76990(19) 0.0166(6) Uani 1 1 d . . . 
Sn1 Sn -0.2522(4) 0.0879(4) -0.2458(3) 0.0084(6) Uani 0.216(5) 1 d P . . 
Sc1 Sc -0.2522(4) 0.0879(4) -0.2458(3) 0.0084(6) Uani 0.784(5) 1 d P . . 
Sn2 Sn -0.2530(3) 0.6134(4) -0.7469(3) 0.0104(5) Uani 0.336(5) 1 d P . . 
Sc2 Sc -0.2530(3) 0.6134(4) -0.7469(3) 0.0104(5) Uani 0.664(5) 1 d P . . 
Sn3 Sn 0.4605(3) 0.0855(3) -0.0261(3) 0.0073(4) Uani 0.787(6) 1 d P . . 
Sc3 Sc 0.4605(3) 0.0855(3) -0.0261(3) 0.0073(4) Uani 0.213(6) 1 d P . . 
Sn4 Sn 0.4607(3) 0.6146(3) -0.5255(3) 0.0089(4) Uani 0.796(6) 1 d P . . 
Sc4 Sc 0.4607(3) 0.6146(3) -0.5255(3) 0.0089(4) Uani 0.204(6) 1 d P . . 
Si1 Si -0.2317(5) 0.2728(5) -0.0195(4) 0.0089(7) Uani 1 1 d . . . 
Si2 Si -0.2319(5) 0.4280(5) -0.5194(4) 0.0093(7) Uani 1 1 d . . . 
Si3 Si 0.4362(5) 0.2748(5) -0.2527(4) 0.0086(7) Uani 1 1 d . . . 
Si4 Si 0.4359(5) 0.4260(5) -0.7530(4) 0.0088(7) Uani 1 1 d . . . 
Si5 Si -0.0276(5) 0.3829(5) -0.8161(4) 0.0086(7) Uani 1 1 d . . . 
Si6 Si -0.0276(5) 0.3182(5) -0.3164(4) 0.0093(7) Uani 1 1 d . . . 
Si7 Si 0.2286(5) 0.3824(5) -0.4567(4) 0.0094(7) Uani 1 1 d . . . 
Si8 Si 0.2281(5) 0.3185(5) 0.0433(4) 0.0092(7) Uani 1 1 d . . . 
O1 O 0.5749(11) 0.2554(11) -0.2877(9) 0.015(2) Uiso 1 1 d . . . 
O2 O 0.5808(10) 0.4460(10) -0.7846(8) 0.0086(19) Uiso 1 1 d . . . 
O3 O -0.3710(11) 0.2560(11) 0.0136(9) 0.015(2) Uani 1 1 d . . . 
O4 O -0.3756(10) 0.4443(10) -0.4871(8) 0.0074(18) Uani 1 1 d . . . 
O5 O -0.0709(10) -0.0512(10) -0.2004(8) 0.0120(19) Uani 1 1 d . . . 
O6 O -0.0688(10) 0.7518(10) -0.7013(7) 0.0096(18) Uiso 1 1 d . . . 
O7 O 0.2793(10) -0.0525(11) -0.0687(8) 0.014(2) Uani 1 1 d . . . 
O8 O 0.2762(10) 0.7531(11) -0.5689(8) 0.013(2) Uani 1 1 d . . . 
O9 O -0.2111(11) 0.1278(11) -0.0914(8) 0.012(2) Uani 1 1 d . . . 
O10 O -0.2113(10) 0.5730(11) -0.5911(8) 0.010(2) Uiso 1 1 d . . . 
O11 O 0.4132(11) 0.1275(12) -0.1812(8) 0.011(2) Uani 1 1 d . . . 
O12 O 0.4139(11) 0.5732(11) -0.6817(8) 0.010(2) Uiso 1 1 d . . . 
O13 O -0.0941(10) 0.2521(10) 0.0908(7) 0.0119(18) Uani 1 1 d . . . 
O14 O -0.0940(9) 0.4488(10) -0.4087(7) 0.0103(17) Uiso 1 1 d . . . 
O15 O 0.2999(9) 0.2511(10) -0.3601(7) 0.0145(19) Uani 1 1 d . . . 
O16 O 0.3004(10) 0.4496(10) -0.8614(7) 0.0134(19) Uiso 1 1 d . . . 
O17 O -0.1395(11) 0.2838(11) -0.2584(8) 0.0090(18) Uiso 1 1 d . . . 
O18 O -0.1465(11) 0.4178(10) -0.7629(8) 0.0094(19) Uiso 1 1 d . . . 
O19 O 0.3443(11) 0.2837(11) -0.0150(8) 0.012(2) Uani 1 1 d . . . 
O20 O 0.3531(11) 0.4160(12) -0.5079(8) 0.014(2) Uani 1 1 d . . . 
O21 O -0.3117(10) 0.0388(10) -0.4038(7) 0.0095(18) Uani 1 1 d . . . 
O22 O -0.3117(10) 0.6590(10) 0.0966(7) 0.0117(18) Uani 1 1 d . . . 
O23 O 0.5155(10) 0.0392(11) -0.8674(7) 0.0117(19) Uiso 1 1 d . . . 
O24 O 0.5161(10) 0.6586(12) -0.3675(8) 0.013(2) Uani 1 1 d . . . 
O25 O -0.3834(10) -0.1067(11) -0.2289(8) 0.015(2) Uani 1 1 d . . . 
O26 O -0.3851(9) 0.8074(11) -0.7313(7) 0.0121(19) Uani 1 1 d . . . 
O27 O 0.5868(10) -0.0979(10) -0.0419(7) 0.0117(19) Uiso 1 1 d . . . 
O28 O 0.5908(9) 0.7993(9) -0.5393(7) 0.0074(18) Uiso 1 1 d . . . 
 
loop_ 
 _atom_site_aniso_label 
 _atom_site_aniso_U_11 
 _atom_site_aniso_U_22 
 _atom_site_aniso_U_33 
 _atom_site_aniso_U_23 
 _atom_site_aniso_U_13 
 _atom_site_aniso_U_12 
Ca1 0.0118(14) 0.0107(13) 0.0270(17) 0.0018(12) 0.0015(12) 0.0006(10) 
Ca2 0.0122(14) 0.0130(13) 0.0218(16) -0.0003(11) -0.0005(12) 0.0003(10) 
Ca3 0.0100(14) 0.0132(13) 0.0251(17) 0.0018(11) -0.0006(12) -0.0001(10) 
Ca4 0.0092(14) 0.0156(13) 0.0201(16) -0.0027(11) -0.0019(11) -0.0011(10) 
Sn1 0.0107(11) 0.0088(10) 0.0054(12) -0.0006(8) 0.0020(9) 0.0025(8) 
Sc1 0.0107(11) 0.0088(10) 0.0054(12) -0.0006(8) 0.0020(9) 0.0025(8) 
Sn2 0.0093(10) 0.0138(10) 0.0071(11) 0.0003(8) 0.0014(8) -0.0025(7) 
Sc2 0.0093(10) 0.0138(10) 0.0071(11) 0.0003(8) 0.0014(8) -0.0025(7) 
Sn3 0.0069(7) 0.0085(7) 0.0061(7) -0.0006(5) 0.0016(5) -0.0014(5) 
Sc3 0.0069(7) 0.0085(7) 0.0061(7) -0.0006(5) 0.0016(5) -0.0014(5) 
Sn4 0.0061(6) 0.0114(7) 0.0079(8) -0.0017(5) 0.0005(5) -0.0003(5) 
Sc4 0.0061(6) 0.0114(7) 0.0079(8) -0.0017(5) 0.0005(5) -0.0003(5) 
Si1 0.0070(17) 0.0099(17) 0.0091(18) 0.0000(13) 0.0015(14) -0.0009(13) 
Si2 0.0099(18) 0.0093(17) 0.0102(19) 0.0038(14) 0.0055(14) 0.0029(13) 
Si3 0.0053(17) 0.0130(18) 0.0062(18) -0.0021(14) -0.0001(13) -0.0025(13) 
Si4 0.0078(17) 0.0099(17) 0.0090(18) -0.0012(14) 0.0032(14) -0.0008(13) 
Si5 0.0034(16) 0.0102(17) 0.0105(19) 0.0016(13) -0.0001(13) 0.0012(13) 
Si6 0.0068(17) 0.0100(17) 0.0105(19) -0.0031(14) 0.0021(14) 0.0007(13) 
Si7 0.0077(17) 0.0140(17) 0.0063(18) 0.0027(13) 0.0022(13) -0.0003(13) 
Si8 0.0083(17) 0.0120(17) 0.0070(18) -0.0021(13) 0.0020(13) -0.0027(13) 
O3 0.012(4) 0.016(4) 0.022(4) -0.001(3) 0.013(3) 0.001(3) 
O4 0.002(3) 0.010(3) 0.010(3) 0.001(2) 0.002(3) -0.002(2) 
O5 0.015(5) 0.007(4) 0.012(5) -0.002(4) 0.001(4) 0.001(3) 
O7 0.007(3) 0.013(3) 0.017(4) -0.002(3) -0.002(3) -0.002(2) 
O8 0.004(4) 0.015(4) 0.018(5) 0.006(4) 0.001(4) 0.003(3) 
O9 0.014(4) 0.013(4) 0.008(3) 0.001(2) 0.004(3) 0.002(2) 
O11 0.012(4) 0.014(4) 0.003(3) 0.002(2) -0.002(2) -0.004(3) 
O13 0.015(3) 0.010(3) 0.009(3) 0.000(2) 0.002(3) 0.001(2) 
O15 0.010(3) 0.015(3) 0.015(4) 0.000(2) -0.001(3) -0.002(2) 
O19 0.009(4) 0.017(4) 0.013(4) -0.003(3) 0.006(3) 0.002(3) 
O20 0.010(4) 0.016(4) 0.017(4) -0.002(3) 0.006(3) -0.005(3) 
O21 0.013(5) 0.002(4) 0.011(5) -0.001(4) 0.001(4) 0.004(3) 
O22 0.013(3) 0.015(3) 0.006(3) 0.001(2) 0.002(3) -0.004(2) 
O24 0.009(4) 0.025(5) 0.005(4) 0.003(4) 0.001(3) 0.001(4) 
O25 0.012(4) 0.020(4) 0.010(3) 0.001(3) 0.001(3) 0.001(3) 
O26 0.005(3) 0.023(4) 0.004(3) -0.003(3) -0.004(2) 0.000(3) 
 
_geom_special_details 
; 
 All esds (except the esd in the dihedral angle between two l.s. planes) 
 are estimated using the full covariance matrix.  The cell esds are taken 
 into account individually in the estimation of esds in distances, angles 
 and torsion angles; correlations between esds in cell parameters are only 
 used when they are defined by crystal symmetry.  An approximate (isotropic) 
 treatment of cell esds is used for estimating esds involving l.s. planes. 
; 
 
loop_ 
 _geom_bond_atom_site_label_1 
 _geom_bond_atom_site_label_2 
 _geom_bond_distance 
 _geom_bond_site_symmetry_2 
 _geom_bond_publ_flag 
Ca1 O22 2.328(9) 2_545 ? 
Ca1 O9 2.330(10) . ? 
Ca1 O19 2.362(10) 2_445 ? 
Ca1 O3 2.400(10) 2_545 ? 
Ca1 O5 2.564(9) . ? 
Ca1 O2 2.753(10) 2_446 ? 
Ca1 O13 2.755(8) . ? 
Ca1 Si1 3.214(4) . ? 
Ca1 Si8 3.336(4) 2_445 ? 
Ca1 Si1 3.379(4) 2_545 ? 
Ca1 Si8 3.446(4) . ? 
Ca1 Sn1 3.499(3) . ? 
Ca2 O20 2.320(10) 2_455 ? 
Ca2 O21 2.327(9) 2 ? 
Ca2 O10 2.343(9) . ? 
Ca2 O4 2.375(9) 2 ? 
Ca2 O6 2.598(9) . ? 
Ca2 O1 2.699(11) 2_455 ? 
Ca2 O14 2.748(8) . ? 
Ca2 Si2 3.216(4) . ? 
Ca2 Si7 3.333(4) 2_455 ? 
Ca2 Si2 3.378(4) 2 ? 
Ca2 Si7 3.440(4) . ? 
Ca2 Sn4 3.510(3) 2_455 ? 
Ca3 O24 2.327(10) 2_445 ? 
Ca3 O11 2.336(10) . ? 
Ca3 O1 2.367(10) 2_445 ? 
Ca3 O17 2.369(9) 2_545 ? 
Ca3 O7 2.569(10) . ? 
Ca3 O4 2.774(10) 2_545 ? 
Ca3 O15 2.784(9) . ? 
Ca3 Si3 3.269(4) . ? 
Ca3 Si3 3.321(4) 2_445 ? 
Ca3 Si6 3.334(5) 2_545 ? 
Ca3 Si6 3.468(4) . ? 
Ca3 Sc1 3.471(3) 2_545 ? 
Ca4 O18 2.340(9) 2 ? 
Ca4 O12 2.340(10) . ? 
Ca4 O23 2.345(9) 2_455 ? 
Ca4 O2 2.348(9) 2_455 ? 
Ca4 O8 2.568(10) . ? 
Ca4 O3 2.770(12) 2_554 ? 
Ca4 O16 2.794(9) . ? 
Ca4 Si4 3.264(5) . ? 
Ca4 Si4 3.326(5) 2_455 ? 
Ca4 Si5 3.334(5) 2 ? 
Ca4 Si5 3.465(4) . ? 
Ca4 Sc2 3.476(3) 2 ? 
Sn1 O9 1.989(9) . ? 
Sn1 O17 2.035(9) . ? 
Sn1 O21 2.035(9) . ? 
Sn1 O5 2.078(9) . ? 
Sn1 O25 2.157(9) . ? 
Sn1 O1 2.161(10) 1_455 ? 
Sn1 Ca3 3.471(3) 2_455 ? 
Sn1 Ca2 3.592(4) 2_445 ? 
Sn2 O22 2.009(8) 1_554 ? 
Sn2 O18 2.010(9) . ? 
Sn2 O10 2.009(9) . ? 
Sn2 O6 2.098(9) . ? 
Sn2 O2 2.113(9) 1_455 ? 
Sn2 O26 2.154(8) . ? 
Sn2 Ca4 3.476(3) 2_445 ? 
Sn2 Ca1 3.599(3) 2_454 ? 
Sn3 O11 1.994(9) . ? 
Sn3 O23 2.041(9) 1_556 ? 
Sn3 O27 2.050(9) . ? 
Sn3 O19 2.066(9) . ? 
Sn3 O7 2.073(9) . ? 
Sn3 O3 2.145(10) 1_655 ? 
Sn3 Ca1 3.511(3) 2 ? 
Sn3 Ca4 3.618(3) 2_546 ? 
Sn4 O12 2.009(9) . ? 
Sn4 O24 2.027(9) . ? 
Sn4 O20 2.043(9) . ? 
Sn4 O28 2.074(8) . ? 
Sn4 O8 2.101(9) . ? 
Sn4 O4 2.111(9) 1_655 ? 
Sn4 Ca2 3.510(3) 2_545 ? 
Sn4 Ca3 3.609(3) 2 ? 
Si1 O3 1.604(10) . ? 
Si1 O9 1.605(10) . ? 
Si1 O7 1.626(10) 2_455 ? 
Si1 O13 1.664(9) . ? 
Si1 Sc3 3.278(3) 2_455 ? 
Si1 Ca1 3.379(4) 2_455 ? 
Si2 O10 1.602(10) . ? 
Si2 O8 1.625(10) 2_445 ? 
Si2 O4 1.639(9) . ? 
Si2 O14 1.668(9) . ? 
Si2 Ca2 3.378(4) 2_445 ? 
Si3 O1 1.613(11) . ? 
Si3 O11 1.624(10) . ? 
Si3 O5 1.632(9) 2 ? 
Si3 O15 1.635(9) . ? 
Si3 Sc1 3.258(4) 2 ? 
Si3 Ca3 3.321(4) 2 ? 
Si3 Ca2 3.595(5) 2_545 ? 
Si4 O12 1.618(10) . ? 
Si4 O6 1.625(9) 2_545 ? 
Si4 O16 1.639(10) . ? 
Si4 O2 1.648(10) . ? 
Si4 Sc2 3.256(4) 2_545 ? 
Si4 Ca4 3.326(5) 2_545 ? 
Si4 Ca1 3.607(5) 2_554 ? 
Si5 O23 1.604(9) 2_455 ? 
Si5 O18 1.601(10) . ? 
Si5 O13 1.628(9) 1_554 ? 
Si5 O26 1.632(9) 2_545 ? 
Si5 Sc3 3.245(4) 2_454 ? 
Si5 Ca4 3.334(5) 2_445 ? 
Si6 O17 1.584(10) . ? 
Si6 O14 1.620(9) . ? 
Si6 O24 1.628(10) 2_445 ? 
Si6 O25 1.657(10) 2 ? 
Si6 Sc4 3.238(4) 2_445 ? 
Si6 Ca3 3.334(5) 2_455 ? 
Si7 O21 1.604(9) 2 ? 
Si7 O28 1.617(9) 2_445 ? 
Si7 O20 1.631(10) . ? 
Si7 O15 1.668(9) . ? 
Si7 Sc1 3.250(4) 2 ? 
Si7 Ca2 3.333(4) 2_545 ? 
Si8 O19 1.625(10) . ? 
Si8 O22 1.627(9) 2_545 ? 
Si8 O27 1.654(10) 2_455 ? 
Si8 O16 1.658(9) 1_556 ? 
Si8 Sc2 3.236(4) 2_546 ? 
Si8 Ca1 3.336(4) 2 ? 
O1 Sc1 2.161(10) 1_655 ? 
O1 Sn1 2.161(10) 1_655 ? 
O1 Ca3 2.367(9) 2 ? 
O1 Ca2 2.699(11) 2_545 ? 
O2 Sc2 2.113(9) 1_655 ? 
O2 Sn2 2.113(9) 1_655 ? 
O2 Ca4 2.348(9) 2_545 ? 
O2 Ca1 2.753(10) 2_554 ? 
O3 Sc3 2.145(9) 1_455 ? 
O3 Sn3 2.145(9) 1_455 ? 
O3 Ca1 2.400(10) 2_455 ? 
O3 Ca4 2.770(12) 2_446 ? 
O4 Sc4 2.111(9) 1_455 ? 
O4 Sn4 2.111(9) 1_455 ? 
O4 Ca2 2.375(9) 2_445 ? 
O4 Ca3 2.775(10) 2_455 ? 
O5 Si3 1.632(9) 2_445 ? 
O6 Si4 1.625(9) 2_455 ? 
O7 Si1 1.626(10) 2_545 ? 
O8 Si2 1.625(10) 2 ? 
O13 Si5 1.628(9) 1_556 ? 
O16 Si8 1.658(9) 1_554 ? 
O17 Ca3 2.369(9) 2_455 ? 
O18 Ca4 2.340(9) 2_445 ? 
O19 Ca1 2.362(10) 2 ? 
O20 Ca2 2.320(10) 2_545 ? 
O21 Si7 1.604(9) 2_445 ? 
O21 Ca2 2.327(9) 2_445 ? 
O22 Si8 1.627(9) 2_455 ? 
O22 Sc2 2.009(8) 1_556 ? 
O22 Sn2 2.009(8) 1_556 ? 
O22 Ca1 2.328(9) 2_455 ? 
O23 Si5 1.604(9) 2_545 ? 
O23 Sc3 2.041(9) 1_554 ? 
O23 Sn3 2.041(9) 1_554 ? 
O23 Ca4 2.345(9) 2_545 ? 
O24 Si6 1.628(10) 2 ? 
O24 Ca3 2.327(10) 2 ? 
O25 Si6 1.657(10) 2_445 ? 
O26 Si5 1.632(9) 2_455 ? 
O27 Si8 1.654(10) 2_545 ? 
O28 Si7 1.617(9) 2 ? 
 
loop_ 
 _geom_angle_atom_site_label_1 
 _geom_angle_atom_site_label_2 
 _geom_angle_atom_site_label_3 
 _geom_angle 
 _geom_angle_site_symmetry_1 
 _geom_angle_site_symmetry_3 
 _geom_angle_publ_flag 
O22 Ca1 O9 117.3(3) 2_545 . ? 
O22 Ca1 O19 152.0(4) 2_545 2_445 ? 
O9 Ca1 O19 81.3(4) . 2_445 ? 
O22 Ca1 O3 97.4(3) 2_545 2_545 ? 
O9 Ca1 O3 143.9(4) . 2_545 ? 
O19 Ca1 O3 71.0(3) 2_445 2_545 ? 
O22 Ca1 O5 124.8(3) 2_545 . ? 
O9 Ca1 O5 68.8(3) . . ? 
O19 Ca1 O5 80.3(3) 2_445 . ? 
O3 Ca1 O5 83.9(3) 2_545 . ? 
O22 Ca1 O2 67.0(3) 2_545 2_446 ? 
O9 Ca1 O2 121.9(3) . 2_446 ? 
O19 Ca1 O2 85.5(3) 2_445 2_446 ? 
O3 Ca1 O2 79.2(3) 2_545 2_446 ? 
O5 Ca1 O2 160.8(3) . 2_446 ? 
O22 Ca1 O13 69.4(3) 2_545 . ? 
O9 Ca1 O13 59.5(3) . . ? 
O19 Ca1 O13 108.5(3) 2_445 . ? 
O3 Ca1 O13 151.4(4) 2_545 . ? 
O5 Ca1 O13 124.6(3) . . ? 
O2 Ca1 O13 72.3(3) 2_446 . ? 
O22 Ca1 Si1 94.0(2) 2_545 . ? 
O9 Ca1 Si1 28.3(2) . . ? 
O19 Ca1 Si1 95.8(3) 2_445 . ? 
O3 Ca1 Si1 166.8(3) 2_545 . ? 
O5 Ca1 Si1 95.1(2) . . ? 
O2 Ca1 Si1 99.2(2) 2_446 . ? 
O13 Ca1 Si1 31.17(19) . . ? 
O22 Ca1 Si8 136.7(2) 2_545 2_445 ? 
O9 Ca1 Si8 69.4(3) . 2_445 ? 
O19 Ca1 Si8 26.8(2) 2_445 2_445 ? 
O3 Ca1 Si8 92.7(3) 2_545 2_445 ? 
O5 Ca1 Si8 98.0(2) . 2_445 ? 
O2 Ca1 Si8 73.9(2) 2_446 2_445 ? 
O13 Ca1 Si8 81.9(2) . 2_445 ? 
Si1 Ca1 Si8 74.33(11) . 2_445 ? 
O22 Ca1 Si1 81.0(2) 2_545 2_545 ? 
O9 Ca1 Si1 146.1(3) . 2_545 ? 
O19 Ca1 Si1 94.6(2) 2_445 2_545 ? 
O3 Ca1 Si1 25.8(2) 2_545 2_545 ? 
O5 Ca1 Si1 77.4(2) . 2_545 ? 
O2 Ca1 Si1 91.0(2) 2_446 2_545 ? 
O13 Ca1 Si1 149.8(2) . 2_545 ? 
Si1 Ca1 Si1 165.93(16) . 2_545 ? 
Si8 Ca1 Si1 118.16(11) 2_445 2_545 ? 
O22 Ca1 Si8 24.1(2) 2_545 . ? 
O9 Ca1 Si8 99.7(3) . . ? 
O19 Ca1 Si8 175.3(3) 2_445 . ? 
O3 Ca1 Si8 109.8(3) 2_545 . ? 
O5 Ca1 Si8 104.3(2) . . ? 
O2 Ca1 Si8 90.0(2) 2_446 . ? 
O13 Ca1 Si8 68.4(2) . . ? 
Si1 Ca1 Si8 83.22(11) . . ? 
Si8 Ca1 Si8 149.54(15) 2_445 . ? 
Si1 Ca1 Si8 87.14(11) 2_545 . ? 
O22 Ca1 Sn1 127.1(2) 2_545 . ? 
O9 Ca1 Sn1 32.7(2) . . ? 
O19 Ca1 Sn1 80.1(3) 2_445 . ? 
O3 Ca1 Sn1 117.2(3) 2_545 . ? 
O5 Ca1 Sn1 36.1(2) . . ? 
O2 Ca1 Sn1 152.4(2) 2_446 . ? 
O13 Ca1 Sn1 90.1(2) . . ? 
Si1 Ca1 Sn1 59.44(9) . . ? 
Si8 Ca1 Sn1 82.93(10) 2_445 . ? 
Si1 Ca1 Sn1 113.41(11) 2_545 . ? 
Si8 Ca1 Sn1 103.28(10) . . ? 
O20 Ca2 O21 151.0(4) 2_455 2 ? 
O20 Ca2 O10 82.7(3) 2_455 . ? 
O21 Ca2 O10 116.9(3) 2 . ? 
O20 Ca2 O4 68.9(3) 2_455 2 ? 
O21 Ca2 O4 99.0(3) 2 2 ? 
O10 Ca2 O4 142.5(3) . 2 ? 
O20 Ca2 O6 82.2(3) 2_455 . ? 
O21 Ca2 O6 123.7(3) 2 . ? 
O10 Ca2 O6 68.9(3) . . ? 
O4 Ca2 O6 83.1(3) 2 . ? 
O20 Ca2 O1 82.9(3) 2_455 2_455 ? 
O21 Ca2 O1 68.8(3) 2 2_455 ? 
O10 Ca2 O1 121.3(3) . 2_455 ? 
O4 Ca2 O1 80.0(3) 2 2_455 ? 
O6 Ca2 O1 160.5(3) . 2_455 ? 
O20 Ca2 O14 108.6(3) 2_455 . ? 
O21 Ca2 O14 69.5(3) 2 . ? 
O10 Ca2 O14 59.5(3) . . ? 
O4 Ca2 O14 152.2(3) 2 . ? 
O6 Ca2 O14 124.6(3) . . ? 
O1 Ca2 O14 72.3(3) 2_455 . ? 
O20 Ca2 Si2 96.8(3) 2_455 . ? 
O21 Ca2 Si2 93.8(2) 2 . ? 
O10 Ca2 Si2 28.3(2) . . ? 
O4 Ca2 Si2 165.7(2) 2 . ? 
O6 Ca2 Si2 95.0(2) . . ? 
O1 Ca2 Si2 99.0(2) 2_455 . ? 
O14 Ca2 Si2 31.25(19) . . ? 
O20 Ca2 Si7 26.6(2) 2_455 2_455 ? 
O21 Ca2 Si7 137.6(3) 2 2_455 ? 
O10 Ca2 Si7 69.1(2) . 2_455 ? 
O4 Ca2 Si7 91.8(2) 2 2_455 ? 
O6 Ca2 Si7 98.1(2) . 2_455 ? 
O1 Ca2 Si7 73.1(2) 2_455 2_455 ? 
O14 Ca2 Si7 81.99(19) . 2_455 ? 
Si2 Ca2 Si7 74.31(11) . 2_455 ? 
O20 Ca2 Si2 93.6(3) 2_455 2 ? 
O21 Ca2 Si2 81.5(2) 2 2 ? 
O10 Ca2 Si2 145.6(3) . 2 ? 
O4 Ca2 Si2 26.5(2) 2 2 ? 
O6 Ca2 Si2 76.7(2) . 2 ? 
O1 Ca2 Si2 91.9(2) 2_455 2 ? 
O14 Ca2 Si2 150.4(2) . 2 ? 
Si2 Ca2 Si2 165.73(15) . 2 ? 
Si7 Ca2 Si2 118.00(11) 2_455 2 ? 
O20 Ca2 Si7 174.1(3) 2_455 . ? 
O21 Ca2 Si7 23.5(2) 2 . ? 
O10 Ca2 Si7 99.8(2) . . ? 
O4 Ca2 Si7 110.9(2) 2 . ? 
O6 Ca2 Si7 103.7(2) . . ? 
O1 Ca2 Si7 91.3(2) 2_455 . ? 
O14 Ca2 Si7 68.79(19) . . ? 
Si2 Ca2 Si7 83.44(10) . . ? 
Si7 Ca2 Si7 150.06(15) 2_455 . ? 
Si2 Ca2 Si7 87.20(11) 2 . ? 
O20 Ca2 Sn4 33.8(2) 2_455 2_455 ? 
O21 Ca2 Sn4 132.8(2) 2 2_455 ? 
O10 Ca2 Sn4 110.2(2) . 2_455 ? 
O4 Ca2 Sn4 35.9(2) 2 2_455 ? 
O6 Ca2 Sn4 75.23(19) . 2_455 ? 
O1 Ca2 Sn4 85.4(2) 2_455 2_455 ? 
O14 Ca2 Sn4 139.7(2) . 2_455 ? 
Si2 Ca2 Sn4 129.88(11) . 2_455 ? 
Si7 Ca2 Sn4 59.25(8) 2_455 2_455 ? 
Si2 Ca2 Sn4 59.82(7) 2 2_455 ? 
Si7 Ca2 Sn4 146.64(11) . 2_455 ? 
O24 Ca3 O11 115.9(3) 2_445 . ? 
O24 Ca3 O1 98.0(4) 2_445 2_445 ? 
O11 Ca3 O1 145.4(4) . 2_445 ? 
O24 Ca3 O17 151.1(4) 2_445 2_545 ? 
O11 Ca3 O17 80.9(3) . 2_545 ? 
O1 Ca3 O17 71.6(3) 2_445 2_545 ? 
O24 Ca3 O7 126.2(3) 2_445 . ? 
O11 Ca3 O7 68.5(3) . . ? 
O1 Ca3 O7 86.2(3) 2_445 . ? 
O17 Ca3 O7 80.9(3) 2_545 . ? 
O24 Ca3 O4 67.1(3) 2_445 2_545 ? 
O11 Ca3 O4 120.0(3) . 2_545 ? 
O1 Ca3 O4 78.5(3) 2_445 2_545 ? 
O17 Ca3 O4 84.2(3) 2_545 2_545 ? 
O7 Ca3 O4 161.4(3) . 2_545 ? 
O24 Ca3 O15 69.1(3) 2_445 . ? 
O11 Ca3 O15 57.8(3) . . ? 
O1 Ca3 O15 150.4(3) 2_445 . ? 
O17 Ca3 O15 106.5(3) 2_545 . ? 
O7 Ca3 O15 123.0(3) . . ? 
O4 Ca3 O15 72.0(3) 2_545 . ? 
O24 Ca3 Si3 92.7(3) 2_445 . ? 
O11 Ca3 Si3 27.8(2) . . ? 
O1 Ca3 Si3 166.1(3) 2_445 . ? 
O17 Ca3 Si3 94.7(3) 2_545 . ? 
O7 Ca3 Si3 94.4(2) . . ? 
O4 Ca3 Si3 97.8(2) 2_545 . ? 
O15 Ca3 Si3 30.00(19) . . ? 
O24 Ca3 Si3 81.6(3) 2_445 2_445 ? 
O11 Ca3 Si3 147.6(3) . 2_445 ? 
O1 Ca3 Si3 26.8(2) 2_445 2_445 ? 
O17 Ca3 Si3 96.2(2) 2_545 2_445 ? 
O7 Ca3 Si3 79.2(2) . 2_445 ? 
O4 Ca3 Si3 91.5(2) 2_545 2_445 ? 
O15 Ca3 Si3 150.0(2) . 2_445 ? 
Si3 Ca3 Si3 166.32(16) . 2_445 ? 
O24 Ca3 Si6 135.3(3) 2_445 2_545 ? 
O11 Ca3 Si6 69.3(3) . 2_545 ? 
O1 Ca3 Si6 92.2(3) 2_445 2_545 ? 
O17 Ca3 Si6 25.8(2) 2_545 2_545 ? 
O7 Ca3 Si6 97.7(2) . 2_545 ? 
O4 Ca3 Si6 72.6(2) 2_545 2_545 ? 
O15 Ca3 Si6 80.9(2) . 2_545 ? 
Si3 Ca3 Si6 73.98(11) . 2_545 ? 
Si3 Ca3 Si6 118.65(12) 2_445 2_545 ? 
O24 Ca3 Si6 23.6(2) 2_445 . ? 
O11 Ca3 Si6 99.4(3) . . ? 
O1 Ca3 Si6 110.3(3) 2_445 . ? 
O17 Ca3 Si6 173.2(3) 2_545 . ? 
O7 Ca3 Si6 105.6(2) . . ? 
O4 Ca3 Si6 89.8(2) 2_545 . ? 
O15 Ca3 Si6 68.5(2) . . ? 
Si3 Ca3 Si6 82.90(11) . . ? 
Si3 Ca3 Si6 87.15(11) 2_445 . ? 
Si6 Ca3 Si6 148.27(16) 2_545 . ? 
O24 Ca3 Sc1 133.5(3) 2_445 2_545 ? 
O11 Ca3 Sc1 110.3(3) . 2_545 ? 
O1 Ca3 Sc1 37.8(2) 2_445 2_545 ? 
O17 Ca3 Sc1 34.7(2) 2_545 2_545 ? 
O7 Ca3 Sc1 75.9(2) . 2_545 ? 
O4 Ca3 Sc1 85.52(19) 2_545 2_545 ? 
O15 Ca3 Sc1 138.2(2) . 2_545 ? 
Si3 Ca3 Sc1 129.07(12) . 2_545 ? 
Si3 Ca3 Sc1 61.45(8) 2_445 2_545 ? 
Si6 Ca3 Sc1 58.57(8) 2_545 2_545 ? 
Si6 Ca3 Sc1 148.03(12) . 2_545 ? 
O18 Ca4 O12 82.4(3) 2 . ? 
O18 Ca4 O23 149.9(4) 2 2_455 ? 
O12 Ca4 O23 115.6(3) . 2_455 ? 
O18 Ca4 O2 69.3(3) 2 2_455 ? 
O12 Ca4 O2 144.0(3) . 2_455 ? 
O23 Ca4 O2 99.7(3) 2_455 2_455 ? 
O18 Ca4 O8 82.5(3) 2 . ? 
O12 Ca4 O8 69.3(3) . . ? 
O23 Ca4 O8 125.5(3) 2_455 . ? 
O2 Ca4 O8 84.9(3) 2_455 . ? 
O18 Ca4 O3 82.3(3) 2 2_554 ? 
O12 Ca4 O3 119.0(3) . 2_554 ? 
O23 Ca4 O3 68.0(3) 2_455 2_554 ? 
O2 Ca4 O3 79.7(3) 2_455 2_554 ? 
O8 Ca4 O3 161.4(3) . 2_554 ? 
O18 Ca4 O16 106.7(3) 2 . ? 
O12 Ca4 O16 57.9(3) . . ? 
O23 Ca4 O16 68.9(3) 2_455 . ? 
O2 Ca4 O16 150.9(3) 2_455 . ? 
O8 Ca4 O16 123.8(3) . . ? 
O3 Ca4 O16 71.2(3) 2_554 . ? 
O18 Ca4 Si4 96.0(3) 2 . ? 
O12 Ca4 Si4 27.8(2) . . ? 
O23 Ca4 Si4 92.4(2) 2_455 . ? 
O2 Ca4 Si4 165.2(3) 2_455 . ? 
O8 Ca4 Si4 95.0(2) . . ? 
O3 Ca4 Si4 97.1(2) 2_554 . ? 
O16 Ca4 Si4 30.1(2) . . ? 
O18 Ca4 Si4 95.2(2) 2 2_455 ? 
O12 Ca4 Si4 147.9(3) . 2_455 ? 
O23 Ca4 Si4 81.8(2) 2_455 2_455 ? 
O2 Ca4 Si4 27.5(2) 2_455 2_455 ? 
O8 Ca4 Si4 78.7(2) . 2_455 ? 
O3 Ca4 Si4 92.1(2) 2_554 2_455 ? 
O16 Ca4 Si4 149.9(2) . 2_455 ? 
Si4 Ca4 Si4 166.40(17) . 2_455 ? 
O18 Ca4 Si5 26.0(2) 2 2 ? 
O12 Ca4 Si5 69.1(3) . 2 ? 
O23 Ca4 Si5 135.5(3) 2_455 2 ? 
O2 Ca4 Si5 91.3(2) 2_455 2 ? 
O8 Ca4 Si5 98.2(2) . 2 ? 
O3 Ca4 Si5 71.9(2) 2_554 2 ? 
O16 Ca4 Si5 80.7(2) . 2 ? 
Si4 Ca4 Si5 74.06(11) . 2 ? 
Si4 Ca4 Si5 118.53(12) 2_455 2 ? 
O18 Ca4 Si5 172.3(3) 2 . ? 
O12 Ca4 Si5 99.6(2) . . ? 
O23 Ca4 Si5 23.2(2) 2_455 . ? 
O2 Ca4 Si5 111.4(2) 2_455 . ? 
O8 Ca4 Si5 105.1(2) . . ? 
O3 Ca4 Si5 90.3(2) 2_554 . ? 
O16 Ca4 Si5 68.77(19) . . ? 
Si4 Ca4 Si5 82.95(11) . . ? 
Si4 Ca4 Si5 87.06(11) 2_455 . ? 
Si5 Ca4 Si5 148.48(15) 2 . ? 
O18 Ca4 Sc2 33.8(2) 2 2 ? 
O12 Ca4 Sc2 110.4(2) . 2 ? 
O23 Ca4 Sc2 133.6(2) 2_455 2 ? 
O2 Ca4 Sc2 36.4(2) 2_455 2 ? 
O8 Ca4 Sc2 76.2(2) . 2 ? 
O3 Ca4 Sc2 85.2(2) 2_554 2 ? 
O16 Ca4 Sc2 137.8(2) . 2 ? 
Si4 Ca4 Sc2 129.21(11) . 2 ? 
Si4 Ca4 Sc2 61.36(8) 2_455 2 ? 
Si5 Ca4 Sc2 58.48(8) 2 2 ? 
Si5 Ca4 Sc2 147.82(12) . 2 ? 
O9 Sn1 O17 90.9(4) . . ? 
O9 Sn1 O21 174.8(4) . . ? 
O17 Sn1 O21 93.5(4) . . ? 
O9 Sn1 O5 85.9(4) . . ? 
O17 Sn1 O5 91.3(4) . . ? 
O21 Sn1 O5 96.8(4) . . ? 
O9 Sn1 O25 87.0(4) . . ? 
O17 Sn1 O25 175.2(4) . . ? 
O21 Sn1 O25 88.4(3) . . ? 
O5 Sn1 O25 92.8(3) . . ? 
O9 Sn1 O1 92.0(4) . 1_455 ? 
O17 Sn1 O1 82.6(4) . 1_455 ? 
O21 Sn1 O1 85.8(4) . 1_455 ? 
O5 Sn1 O1 173.6(4) . 1_455 ? 
O25 Sn1 O1 93.2(3) . 1_455 ? 
O9 Sn1 Ca3 84.5(3) . 2_455 ? 
O17 Sn1 Ca3 41.5(3) . 2_455 ? 
O21 Sn1 Ca3 96.9(2) . 2_455 ? 
O5 Sn1 Ca3 131.4(2) . 2_455 ? 
O25 Sn1 Ca3 133.9(2) . 2_455 ? 
O1 Sn1 Ca3 42.2(3) 1_455 2_455 ? 
O9 Sn1 Ca1 39.3(3) . . ? 
O17 Sn1 Ca1 89.8(3) . . ? 
O21 Sn1 Ca1 143.4(3) . . ? 
O5 Sn1 Ca1 46.6(3) . . ? 
O25 Sn1 Ca1 91.2(3) . . ? 
O1 Sn1 Ca1 130.7(3) 1_455 . ? 
Ca3 Sn1 Ca1 109.25(8) 2_455 . ? 
O9 Sn1 Ca2 140.4(3) . 2_445 ? 
O17 Sn1 Ca2 86.6(3) . 2_445 ? 
O21 Sn1 Ca2 37.3(2) . 2_445 ? 
O5 Sn1 Ca2 133.6(3) . 2_445 ? 
O25 Sn1 Ca2 92.3(3) . 2_445 ? 
O1 Sn1 Ca2 48.5(3) 1_455 2_445 ? 
Ca3 Sn1 Ca2 67.80(7) 2_455 2_445 ? 
Ca1 Sn1 Ca2 176.44(9) . 2_445 ? 
O22 Sn2 O18 91.8(4) 1_554 . ? 
O22 Sn2 O10 175.0(4) 1_554 . ? 
O18 Sn2 O10 91.9(4) . . ? 
O22 Sn2 O6 97.2(3) 1_554 . ? 
O18 Sn2 O6 92.1(4) . . ? 
O10 Sn2 O6 86.0(4) . . ? 
O22 Sn2 O2 86.6(3) 1_554 1_455 ? 
O18 Sn2 O2 80.5(4) . 1_455 ? 
O10 Sn2 O2 90.8(4) . 1_455 ? 
O6 Sn2 O2 171.8(4) . 1_455 ? 
O22 Sn2 O26 88.6(3) 1_554 . ? 
O18 Sn2 O26 174.2(4) . . ? 
O10 Sn2 O26 87.4(3) . . ? 
O6 Sn2 O26 93.7(3) . . ? 
O2 Sn2 O26 93.7(3) 1_455 . ? 
O22 Sn2 Ca4 96.4(2) 1_554 2_445 ? 
O18 Sn2 Ca4 40.4(3) . 2_445 ? 
O10 Sn2 Ca4 84.3(2) . 2_445 ? 
O6 Sn2 Ca4 130.7(2) . 2_445 ? 
O2 Sn2 Ca4 41.3(2) 1_455 2_445 ? 
O26 Sn2 Ca4 133.8(2) . 2_445 ? 
O22 Sn2 Ca2 144.1(2) 1_554 . ? 
O18 Sn2 Ca2 91.3(3) . . ? 
O10 Sn2 Ca2 39.1(3) . . ? 
O6 Sn2 Ca2 46.9(2) . . ? 
O2 Sn2 Ca2 129.2(3) 1_455 . ? 
O26 Sn2 Ca2 91.8(2) . . ? 
Ca4 Sn2 Ca2 108.72(8) 2_445 . ? 
O22 Sn2 Ca1 36.9(2) 1_554 2_454 ? 
O18 Sn2 Ca1 84.9(3) . 2_454 ? 
O10 Sn2 Ca1 140.4(3) . 2_454 ? 
O6 Sn2 Ca1 133.6(3) . 2_454 ? 
O2 Sn2 Ca1 49.7(3) 1_455 2_454 ? 
O26 Sn2 Ca1 92.0(2) . 2_454 ? 
Ca4 Sn2 Ca1 67.96(6) 2_445 2_454 ? 
Ca2 Sn2 Ca1 176.18(9) . 2_454 ? 
O11 Sn3 O23 178.0(5) . 1_556 ? 
O11 Sn3 O27 88.4(4) . . ? 
O23 Sn3 O27 89.8(3) 1_556 . ? 
O11 Sn3 O19 89.0(4) . . ? 
O23 Sn3 O19 92.7(4) 1_556 . ? 
O27 Sn3 O19 174.9(4) . . ? 
O11 Sn3 O7 85.7(4) . . ? 
O23 Sn3 O7 95.3(4) 1_556 . ? 
O27 Sn3 O7 93.8(3) . . ? 
O19 Sn3 O7 90.4(4) . . ? 
O11 Sn3 O3 92.2(4) . 1_655 ? 
O23 Sn3 O3 87.0(4) 1_556 1_655 ? 
O27 Sn3 O3 93.7(4) . 1_655 ? 
O19 Sn3 O3 82.0(4) . 1_655 ? 
O7 Sn3 O3 172.1(4) . 1_655 ? 
O11 Sn3 Ca1 84.7(3) . 2 ? 
O23 Sn3 Ca1 95.9(2) 1_556 2 ? 
O27 Sn3 Ca1 134.7(2) . 2 ? 
O19 Sn3 Ca1 40.6(3) . 2 ? 
O7 Sn3 Ca1 130.0(3) . 2 ? 
O3 Sn3 Ca1 42.2(3) 1_655 2 ? 
O11 Sn3 Ca3 39.2(3) . . ? 
O23 Sn3 Ca3 141.8(2) 1_556 . ? 
O27 Sn3 Ca3 92.3(3) . . ? 
O19 Sn3 Ca3 88.5(3) . . ? 
O7 Sn3 Ca3 46.5(3) . . ? 
O3 Sn3 Ca3 130.8(3) 1_655 . ? 
Ca1 Sn3 Ca3 109.11(8) 2 . ? 
O11 Sn3 Ca4 142.0(3) . 2_546 ? 
O23 Sn3 Ca4 37.3(2) 1_556 2_546 ? 
O27 Sn3 Ca4 93.3(3) . 2_546 ? 
O19 Sn3 Ca4 86.0(3) . 2_546 ? 
O7 Sn3 Ca4 131.9(3) . 2_546 ? 
O3 Sn3 Ca4 49.8(3) 1_655 2_546 ? 
Ca1 Sn3 Ca4 67.39(6) 2 2_546 ? 
Ca3 Sn3 Ca4 174.27(8) . 2_546 ? 
O12 Sn4 O24 177.6(5) . . ? 
O12 Sn4 O20 91.4(4) . . ? 
O24 Sn4 O20 90.3(4) . . ? 
O12 Sn4 O28 88.7(4) . . ? 
O24 Sn4 O28 89.4(4) . . ? 
O20 Sn4 O28 173.3(4) . . ? 
O12 Sn4 O8 85.7(4) . . ? 
O24 Sn4 O8 95.9(4) . . ? 
O20 Sn4 O8 91.9(4) . . ? 
O28 Sn4 O8 94.8(3) . . ? 
O12 Sn4 O4 91.9(4) . 1_655 ? 
O24 Sn4 O4 86.8(4) . 1_655 ? 
O20 Sn4 O4 79.5(4) . 1_655 ? 
O28 Sn4 O4 93.8(3) . 1_655 ? 
O8 Sn4 O4 171.0(4) . 1_655 ? 
O12 Sn4 Ca2 85.1(3) . 2_545 ? 
O24 Sn4 Ca2 95.2(3) . 2_545 ? 
O20 Sn4 Ca2 39.2(3) . 2_545 ? 
O28 Sn4 Ca2 134.2(2) . 2_545 ? 
O8 Sn4 Ca2 129.7(2) . 2_545 ? 
O4 Sn4 Ca2 41.3(2) 1_655 2_545 ? 
O12 Sn4 Ca4 39.3(3) . . ? 
O24 Sn4 Ca4 142.3(3) . . ? 
O20 Sn4 Ca4 91.3(3) . . ? 
O28 Sn4 Ca4 93.1(2) . . ? 
O8 Sn4 Ca4 46.4(3) . . ? 
O4 Sn4 Ca4 130.4(3) 1_655 . ? 
Ca2 Sn4 Ca4 109.33(7) 2_545 . ? 
O12 Sn4 Ca3 141.9(3) . 2 ? 
O24 Sn4 Ca3 36.8(3) . 2 ? 
O20 Sn4 Ca3 83.3(3) . 2 ? 
O28 Sn4 Ca3 92.4(2) . 2 ? 
O8 Sn4 Ca3 132.0(3) . 2 ? 
O4 Sn4 Ca3 50.1(3) 1_655 2 ? 
Ca2 Sn4 Ca3 67.20(6) 2_545 2 ? 
Ca4 Sn4 Ca3 174.40(8) . 2 ? 
O3 Si1 O9 113.1(5) . . ? 
O3 Si1 O7 111.7(5) . 2_455 ? 
O9 Si1 O7 113.9(5) . 2_455 ? 
O3 Si1 O13 107.1(5) . . ? 
O9 Si1 O13 102.5(5) . . ? 
O7 Si1 O13 107.7(5) 2_455 . ? 
O3 Si1 Ca1 125.9(4) . . ? 
O9 Si1 Ca1 43.6(4) . . ? 
O7 Si1 Ca1 122.3(4) 2_455 . ? 
O13 Si1 Ca1 59.0(3) . . ? 
O3 Si1 Sc3 130.6(4) . 2_455 ? 
O9 Si1 Sc3 113.6(4) . 2_455 ? 
O7 Si1 Sc3 31.5(3) 2_455 2_455 ? 
O13 Si1 Sc3 77.4(3) . 2_455 ? 
Ca1 Si1 Sc3 99.12(11) . 2_455 ? 
O3 Si1 Ca1 40.6(4) . 2_455 ? 
O9 Si1 Ca1 137.5(4) . 2_455 ? 
O7 Si1 Ca1 71.4(4) 2_455 2_455 ? 
O13 Si1 Ca1 116.3(3) . 2_455 ? 
Ca1 Si1 Ca1 165.93(16) . 2_455 ? 
Sc3 Si1 Ca1 92.24(10) 2_455 2_455 ? 
O10 Si2 O8 114.4(5) . 2_445 ? 
O10 Si2 O4 112.8(5) . . ? 
O8 Si2 O4 110.3(5) 2_445 . ? 
O10 Si2 O14 102.5(5) . . ? 
O8 Si2 O14 108.5(5) 2_445 . ? 
O4 Si2 O14 107.7(5) . . ? 
O10 Si2 Ca2 43.9(3) . . ? 
O8 Si2 Ca2 123.2(4) 2_445 . ? 
O4 Si2 Ca2 126.4(3) . . ? 
O14 Si2 Ca2 58.7(3) . . ? 
O10 Si2 Ca2 137.7(4) . 2_445 ? 
O8 Si2 Ca2 70.5(3) 2_445 2_445 ? 
O4 Si2 Ca2 40.2(3) . 2_445 ? 
O14 Si2 Ca2 115.9(3) . 2_445 ? 
Ca2 Si2 Ca2 165.73(15) . 2_445 ? 
O1 Si3 O11 113.2(5) . . ? 
O1 Si3 O5 112.1(5) . 2 ? 
O11 Si3 O5 113.4(5) . 2 ? 
O1 Si3 O15 106.7(5) . . ? 
O11 Si3 O15 100.4(5) . . ? 
O5 Si3 O15 110.0(5) 2 . ? 
O1 Si3 Sc1 130.8(4) . 2 ? 
O11 Si3 Sc1 113.8(4) . 2 ? 
O5 Si3 Sc1 32.6(3) 2 2 ? 
O15 Si3 Sc1 78.3(3) . 2 ? 
O1 Si3 Ca3 125.2(4) . . ? 
O11 Si3 Ca3 42.2(3) . . ? 
O5 Si3 Ca3 122.6(4) 2 . ? 
O15 Si3 Ca3 58.4(3) . . ? 
Sc1 Si3 Ca3 99.69(12) 2 . ? 
O1 Si3 Ca3 41.5(3) . 2 ? 
O11 Si3 Ca3 137.8(4) . 2 ? 
O5 Si3 Ca3 71.0(3) 2 2 ? 
O15 Si3 Ca3 117.9(4) . 2 ? 
Sc1 Si3 Ca3 91.91(10) 2 2 ? 
Ca3 Si3 Ca3 166.32(16) . 2 ? 
O1 Si3 Ca2 44.7(4) . 2_545 ? 
O11 Si3 Ca2 120.3(4) . 2_545 ? 
O5 Si3 Ca2 126.3(4) 2 2_545 ? 
O15 Si3 Ca2 62.0(3) . 2_545 ? 
Sc1 Si3 Ca2 116.48(12) 2 2_545 ? 
Ca3 Si3 Ca2 98.74(11) . 2_545 ? 
Ca3 Si3 Ca2 69.34(9) 2 2_545 ? 
O12 Si4 O6 114.3(5) . 2_545 ? 
O12 Si4 O16 101.1(5) . . ? 
O6 Si4 O16 110.6(5) 2_545 . ? 
O12 Si4 O2 111.8(5) . . ? 
O6 Si4 O2 110.5(5) 2_545 . ? 
O16 Si4 O2 108.0(5) . . ? 
O12 Si4 Sc2 114.2(4) . 2_545 ? 
O6 Si4 Sc2 33.4(3) 2_545 2_545 ? 
O16 Si4 Sc2 78.4(3) . 2_545 ? 
O2 Si4 Sc2 131.1(3) . 2_545 ? 
O12 Si4 Ca4 42.4(4) . . ? 
O6 Si4 Ca4 123.6(4) 2_545 . ? 
O16 Si4 Ca4 58.9(3) . . ? 
O2 Si4 Ca4 125.7(3) . . ? 
Sc2 Si4 Ca4 99.62(11) 2_545 . ? 
O12 Si4 Ca4 137.3(4) . 2_545 ? 
O6 Si4 Ca4 69.9(3) 2_545 2_545 ? 
O16 Si4 Ca4 117.4(3) . 2_545 ? 
O2 Si4 Ca4 41.1(3) . 2_545 ? 
Sc2 Si4 Ca4 91.95(10) 2_545 2_545 ? 
Ca4 Si4 Ca4 166.40(17) . 2_545 ? 
O12 Si4 Ca1 120.2(4) . 2_554 ? 
O6 Si4 Ca1 125.5(3) 2_545 2_554 ? 
O16 Si4 Ca1 61.3(3) . 2_554 ? 
O2 Si4 Ca1 46.7(3) . 2_554 ? 
Sc2 Si4 Ca1 116.17(12) 2_545 2_554 ? 
Ca4 Si4 Ca1 98.80(12) . 2_554 ? 
Ca4 Si4 Ca1 69.44(9) 2_545 2_554 ? 
O23 Si5 O18 112.4(5) 2_455 . ? 
O23 Si5 O13 109.2(5) 2_455 1_554 ? 
O18 Si5 O13 106.4(5) . 1_554 ? 
O23 Si5 O26 108.5(5) 2_455 2_545 ? 
O18 Si5 O26 112.0(5) . 2_545 ? 
O13 Si5 O26 108.2(5) 1_554 2_545 ? 
O23 Si5 Sc3 30.9(3) 2_455 2_454 ? 
O18 Si5 Sc3 117.6(4) . 2_454 ? 
O13 Si5 Sc3 78.9(3) 1_554 2_454 ? 
O26 Si5 Sc3 125.3(3) 2_545 2_454 ? 
O23 Si5 Ca4 142.9(4) 2_455 2_445 ? 
O18 Si5 Ca4 39.8(3) . 2_445 ? 
O13 Si5 Ca4 71.3(3) 1_554 2_445 ? 
O26 Si5 Ca4 106.1(3) 2_545 2_445 ? 
Sc3 Si5 Ca4 126.46(13) 2_454 2_445 ? 
O23 Si5 Ca4 35.2(3) 2_455 . ? 
O18 Si5 Ca4 109.1(3) . . ? 
O13 Si5 Ca4 138.0(3) 1_554 . ? 
O26 Si5 Ca4 78.4(3) 2_545 . ? 
Sc3 Si5 Ca4 65.15(8) 2_454 . ? 
Ca4 Si5 Ca4 148.48(15) 2_445 . ? 
O17 Si6 O14 108.2(5) . . ? 
O17 Si6 O24 112.6(5) . 2_445 ? 
O14 Si6 O24 110.0(5) . 2_445 ? 
O17 Si6 O25 108.7(5) . 2 ? 
O14 Si6 O25 108.8(5) . 2 ? 
O24 Si6 O25 108.4(5) 2_445 2 ? 
O17 Si6 Sc4 119.4(4) . 2_445 ? 
O14 Si6 Sc4 79.4(3) . 2_445 ? 
O24 Si6 Sc4 31.1(3) 2_445 2_445 ? 
O25 Si6 Sc4 125.7(4) 2 2_445 ? 
O17 Si6 Ca3 40.7(3) . 2_455 ? 
O14 Si6 Ca3 71.2(3) . 2_455 ? 
O24 Si6 Ca3 142.8(4) 2_445 2_455 ? 
O25 Si6 Ca3 105.9(3) 2 2_455 ? 
Sc4 Si6 Ca3 126.54(13) 2_445 2_455 ? 
O17 Si6 Ca3 107.8(4) . . ? 
O14 Si6 Ca3 138.3(3) . . ? 
O24 Si6 Ca3 34.9(3) 2_445 . ? 
O25 Si6 Ca3 78.2(3) 2 . ? 
Sc4 Si6 Ca3 65.00(8) 2_445 . ? 
Ca3 Si6 Ca3 148.27(16) 2_455 . ? 
O21 Si7 O28 111.8(5) 2 2_445 ? 
O21 Si7 O20 112.2(5) 2 . ? 
O28 Si7 O20 113.0(5) 2_445 . ? 
O21 Si7 O15 108.0(5) 2 . ? 
O28 Si7 O15 107.2(4) 2_445 . ? 
O20 Si7 O15 104.1(5) . . ? 
O21 Si7 Sc1 30.4(3) 2 2 ? 
O28 Si7 Sc1 127.9(3) 2_445 2 ? 
O20 Si7 Sc1 115.6(4) . 2 ? 
O15 Si7 Sc1 78.2(3) . 2 ? 
O21 Si7 Ca2 141.9(4) 2 2_545 ? 
O28 Si7 Ca2 104.7(3) 2_445 2_545 ? 
O20 Si7 Ca2 39.5(4) . 2_545 ? 
O15 Si7 Ca2 69.9(3) . 2_545 ? 
Sc1 Si7 Ca2 124.63(12) 2 2_545 ? 
O21 Si7 Ca2 35.4(3) 2 . ? 
O28 Si7 Ca2 81.4(3) 2_445 . ? 
O20 Si7 Ca2 110.8(4) . . ? 
O15 Si7 Ca2 137.1(3) . . ? 
Sc1 Si7 Ca2 64.87(9) 2 . ? 
Ca2 Si7 Ca2 150.06(15) 2_545 . ? 
O19 Si8 O22 112.1(5) . 2_545 ? 
O19 Si8 O27 109.6(5) . 2_455 ? 
O22 Si8 O27 111.8(5) 2_545 2_455 ? 
O19 Si8 O16 106.4(5) . 1_556 ? 
O22 Si8 O16 108.8(5) 2_545 1_556 ? 
O27 Si8 O16 107.8(4) 2_455 1_556 ? 
O19 Si8 Sc2 117.9(4) . 2_546 ? 
O22 Si8 Sc2 30.4(3) 2_545 2_546 ? 
O27 Si8 Sc2 127.9(3) 2_455 2_546 ? 
O16 Si8 Sc2 78.8(3) 1_556 2_546 ? 
O19 Si8 Ca1 40.9(3) . 2 ? 
O22 Si8 Ca1 141.6(4) 2_545 2 ? 
O27 Si8 Ca1 104.6(3) 2_455 2 ? 
O16 Si8 Ca1 69.6(3) 1_556 2 ? 
Sc2 Si8 Ca1 124.95(13) 2_546 2 ? 
O19 Si8 Ca1 108.7(4) . . ? 
O22 Si8 Ca1 35.7(3) 2_545 . ? 
O27 Si8 Ca1 80.9(3) 2_455 . ? 
O16 Si8 Ca1 138.2(3) 1_556 . ? 
Sc2 Si8 Ca1 65.08(9) 2_546 . ? 
Ca1 Si8 Ca1 149.54(15) 2 . ? 
Si3 O1 Sc1 133.4(6) . 1_655 ? 
Si3 O1 Sn1 133.4(6) . 1_655 ? 
Sc1 O1 Sn1 0.00(6) 1_655 1_655 ? 
Si3 O1 Ca3 111.7(5) . 2 ? 
Sc1 O1 Ca3 100.0(4) 1_655 2 ? 
Sn1 O1 Ca3 100.0(4) 1_655 2 ? 
Si3 O1 Ca2 110.4(5) . 2_545 ? 
Sc1 O1 Ca2 94.7(4) 1_655 2_545 ? 
Sn1 O1 Ca2 94.7(4) 1_655 2_545 ? 
Ca3 O1 Ca2 101.9(4) 2 2_545 ? 
Si4 O2 Sc2 134.5(5) . 1_655 ? 
Si4 O2 Sn2 134.5(5) . 1_655 ? 
Sc2 O2 Sn2 0.00(6) 1_655 1_655 ? 
Si4 O2 Ca4 111.4(4) . 2_545 ? 
Sc2 O2 Ca4 102.2(4) 1_655 2_545 ? 
Sn2 O2 Ca4 102.2(4) 1_655 2_545 ? 
Si4 O2 Ca1 107.4(4) . 2_554 ? 
Sc2 O2 Ca1 94.5(3) 1_655 2_554 ? 
Sn2 O2 Ca1 94.5(3) 1_655 2_554 ? 
Ca4 O2 Ca1 101.4(3) 2_545 2_554 ? 
Si1 O3 Sc3 132.7(6) . 1_455 ? 
Si1 O3 Sn3 132.7(6) . 1_455 ? 
Sc3 O3 Sn3 0.00(5) 1_455 1_455 ? 
Si1 O3 Ca1 113.6(5) . 2_455 ? 
Sc3 O3 Ca1 101.0(4) 1_455 2_455 ? 
Sn3 O3 Ca1 101.0(4) 1_455 2_455 ? 
Si1 O3 Ca4 110.1(5) . 2_446 ? 
Sc3 O3 Ca4 93.9(4) 1_455 2_446 ? 
Sn3 O3 Ca4 93.9(4) 1_455 2_446 ? 
Ca1 O3 Ca4 99.6(3) 2_455 2_446 ? 
Si2 O4 Sc4 132.4(5) . 1_455 ? 
Si2 O4 Sn4 132.4(5) . 1_455 ? 
Sc4 O4 Sn4 0.00(6) 1_455 1_455 ? 
Si2 O4 Ca2 113.4(4) . 2_445 ? 
Sc4 O4 Ca2 102.8(3) 1_455 2_445 ? 
Sn4 O4 Ca2 102.8(3) 1_455 2_445 ? 
Si2 O4 Ca3 108.5(4) . 2_455 ? 
Sc4 O4 Ca3 94.2(3) 1_455 2_455 ? 
Sn4 O4 Ca3 94.2(3) 1_455 2_455 ? 
Ca2 O4 Ca3 99.6(3) 2_445 2_455 ? 
Si3 O5 Sn1 122.4(5) 2_445 . ? 
Si3 O5 Ca1 124.0(5) 2_445 . ? 
Sn1 O5 Ca1 97.3(3) . . ? 
Si4 O6 Sn2 121.4(5) 2_455 . ? 
Si4 O6 Ca2 123.8(4) 2_455 . ? 
Sn2 O6 Ca2 96.9(3) . . ? 
Si1 O7 Sn3 124.3(5) 2_545 . ? 
Si1 O7 Ca3 122.0(4) 2_545 . ? 
Sn3 O7 Ca3 97.7(4) . . ? 
Si2 O8 Sn4 123.1(5) 2 . ? 
Si2 O8 Ca4 122.3(5) 2 . ? 
Sn4 O8 Ca4 97.2(4) . . ? 
Si1 O9 Sn1 136.2(6) . . ? 
Si1 O9 Ca1 108.1(5) . . ? 
Sn1 O9 Ca1 108.0(4) . . ? 
Si2 O10 Sn2 136.2(5) . . ? 
Si2 O10 Ca2 107.8(5) . . ? 
Sn2 O10 Ca2 108.2(4) . . ? 
Si3 O11 Sn3 135.3(5) . . ? 
Si3 O11 Ca3 110.0(5) . . ? 
Sn3 O11 Ca3 108.1(4) . . ? 
Si4 O12 Sn4 135.3(6) . . ? 
Si4 O12 Ca4 109.8(5) . . ? 
Sn4 O12 Ca4 107.7(4) . . ? 
Si5 O13 Si1 128.1(5) 1_556 . ? 
Si5 O13 Ca1 137.7(5) 1_556 . ? 
Si1 O13 Ca1 89.8(4) . . ? 
Si6 O14 Si2 128.0(5) . . ? 
Si6 O14 Ca2 137.4(4) . . ? 
Si2 O14 Ca2 90.1(4) . . ? 
Si3 O15 Si7 128.2(5) . . ? 
Si3 O15 Ca3 91.6(4) . . ? 
Si7 O15 Ca3 135.8(4) . . ? 
Si4 O16 Si8 128.5(5) . 1_554 ? 
Si4 O16 Ca4 91.0(4) . . ? 
Si8 O16 Ca4 135.5(4) 1_554 . ? 
Si6 O17 Sn1 133.6(5) . . ? 
Si6 O17 Ca3 113.5(5) . 2_455 ? 
Sn1 O17 Ca3 103.8(4) . 2_455 ? 
Si5 O18 Sn2 134.1(5) . . ? 
Si5 O18 Ca4 114.2(5) . 2_445 ? 
Sn2 O18 Ca4 105.8(4) . 2_445 ? 
Si8 O19 Sn3 133.6(6) . . ? 
Si8 O19 Ca1 112.3(5) . 2 ? 
Sn3 O19 Ca1 104.7(4) . 2 ? 
Si7 O20 Sn4 134.1(6) . . ? 
Si7 O20 Ca2 113.9(5) . 2_545 ? 
Sn4 O20 Ca2 107.0(4) . 2_545 ? 
Si7 O21 Sn1 126.1(5) 2_445 . ? 
Si7 O21 Ca2 121.0(5) 2_445 2_445 ? 
Sn1 O21 Ca2 110.7(4) . 2_445 ? 
Si8 O22 Sc2 125.4(5) 2_455 1_556 ? 
Si8 O22 Sn2 125.4(5) 2_455 1_556 ? 
Sc2 O22 Sn2 0.00(11) 1_556 1_556 ? 
Si8 O22 Ca1 120.2(5) 2_455 2_455 ? 
Sc2 O22 Ca1 111.9(4) 1_556 2_455 ? 
Sn2 O22 Ca1 111.9(4) 1_556 2_455 ? 
Si5 O23 Sc3 125.4(5) 2_545 1_554 ? 
Si5 O23 Sn3 125.4(5) 2_545 1_554 ? 
Sc3 O23 Sn3 0.00(7) 1_554 1_554 ? 
Si5 O23 Ca4 121.5(5) 2_545 2_545 ? 
Sc3 O23 Ca4 111.0(4) 1_554 2_545 ? 
Sn3 O23 Ca4 111.0(4) 1_554 2_545 ? 
Si6 O24 Sn4 124.4(5) 2 . ? 
Si6 O24 Ca3 121.5(5) 2 2 ? 
Sn4 O24 Ca3 111.8(4) . 2 ? 
Si6 O25 Sn1 129.6(5) 2_445 . ? 
Si5 O26 Sn2 130.8(5) 2_455 . ? 
Si8 O27 Sn3 131.9(5) 2_545 . ? 
Si7 O28 Sn4 133.2(5) 2 . ? 
